# Supplementary material for: TLR2 Arg753Gln Gene Polymorphism Associated with Tuberculosis Susceptibility: An Updated Meta-Analysis
Source: Hindawi journal article supplement (doi:10.1155/2019/2628101), 2019-01-13

**FigureS1.** Forest plot of TB risk associated with TLR2 Arg753Gln polymorphism after omission the study on mixed population (A vs. G).

**FigureS1.**

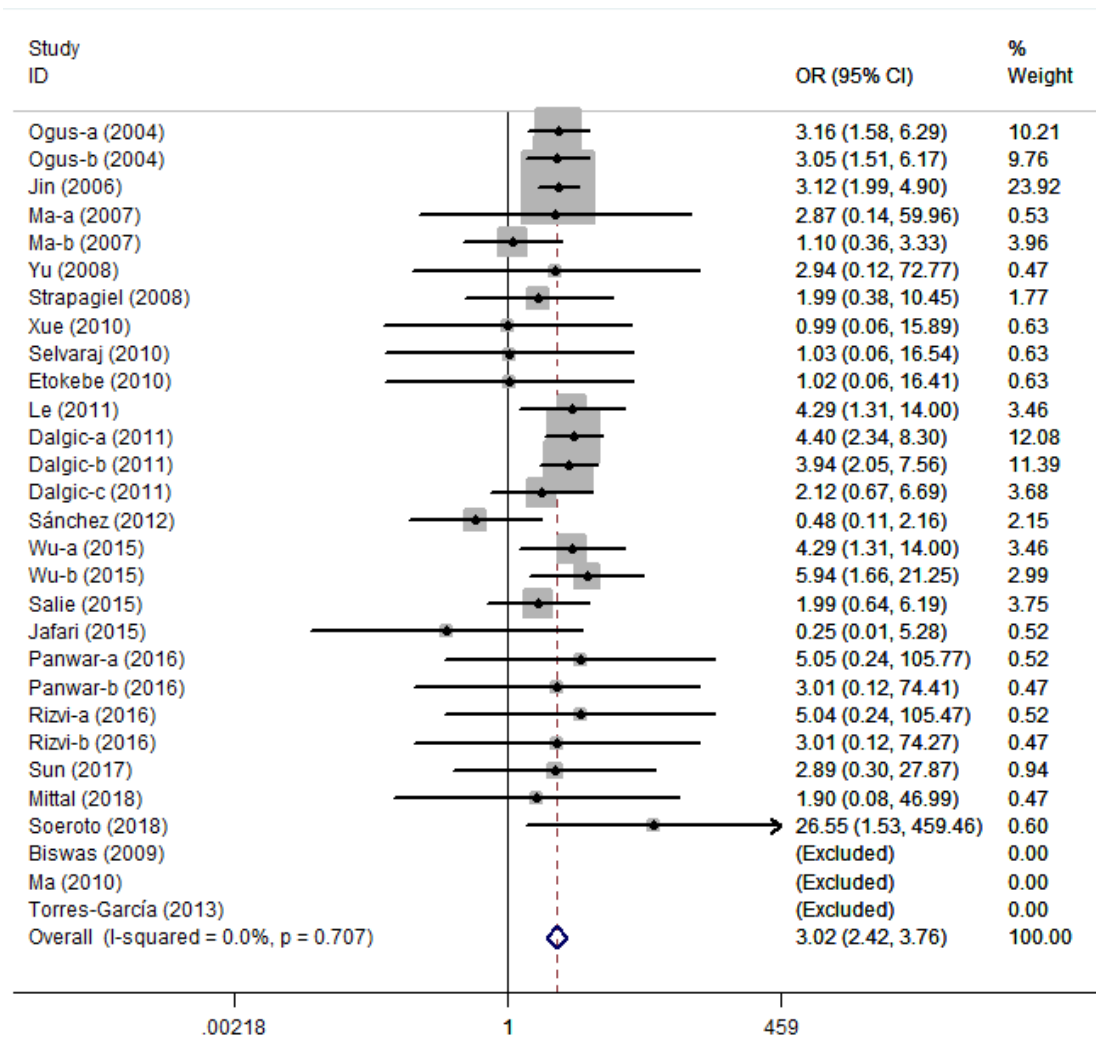

Supplement: f1 [file 2628101.f1.pdf]
